# Supplementary material for: Analysis of Gene Order Conservation in Eukaryotes Identifies Transcriptionally and Functionally Linked Genes
Source: PubMed Central journal article supplement (PMC2871058; doi:10.1371/journal.pone.0010654), 2010-05-14

# Figure S1: Relative orientation of gene pairs

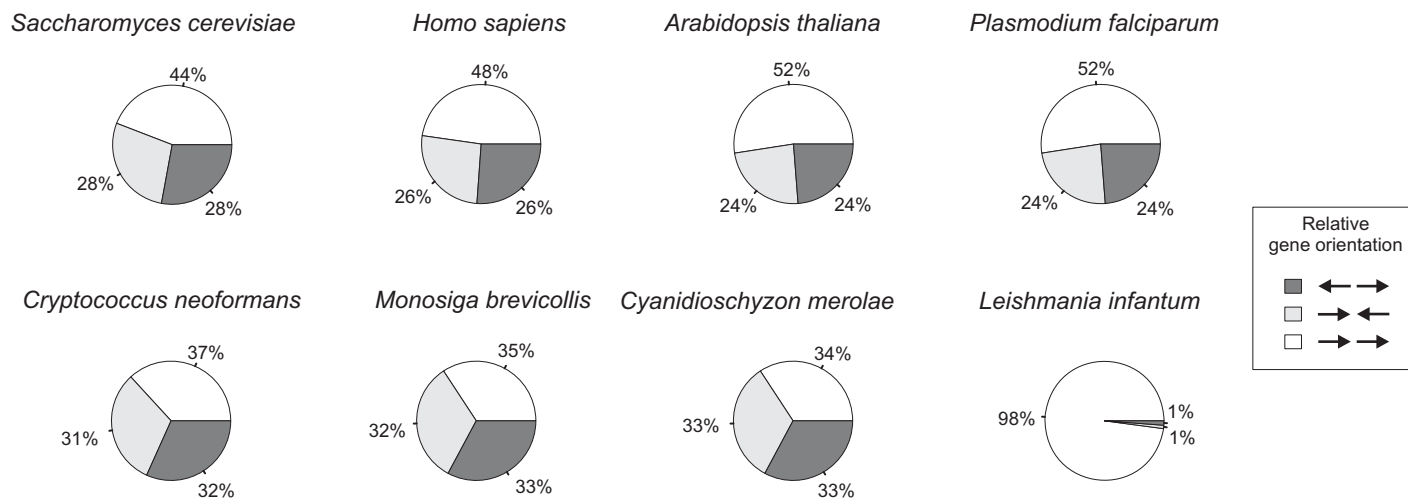

Supplement: pone.0010654.s001.pdf [file pone.0010654.s001.pdf]
