# Supplementary material for: Analysis of Gene Order Conservation in Eukaryotes Identifies Transcriptionally and Functionally Linked Genes
Source: PubMed Central journal article supplement (PMC2871058; doi:10.1371/journal.pone.0010654), 2010-05-14
Supplement: pone.0010654.s002.pdf [file pone.0010654.s002.pdf]

# Figure S2: Distribution of intergenic distances

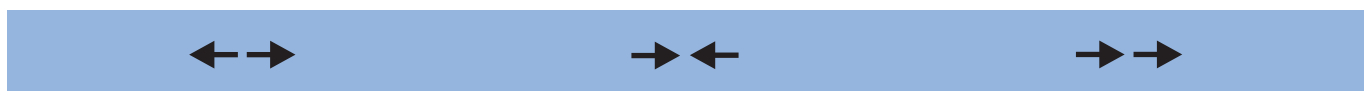

## *Aspergillus nidulans*

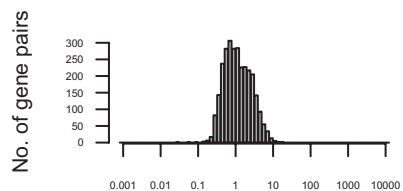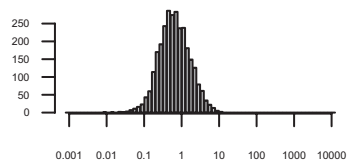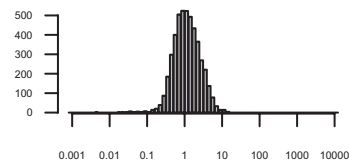

## *Aspergillus terreus*

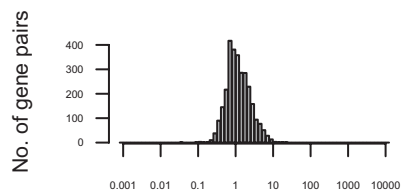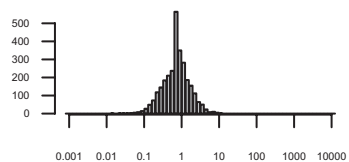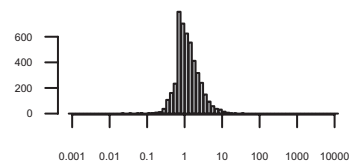

## *Botrytis cinerea*

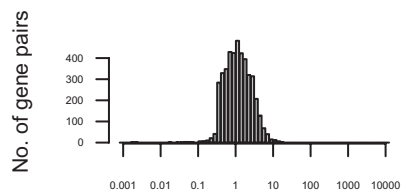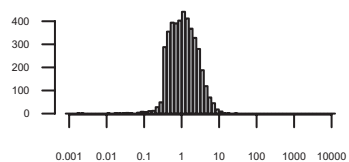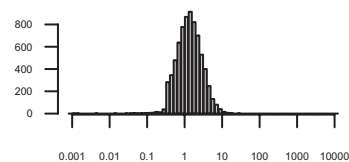

## *Chaetomium globosum*

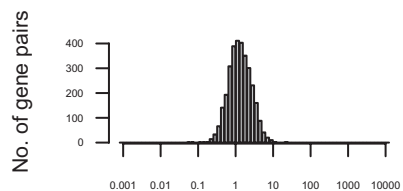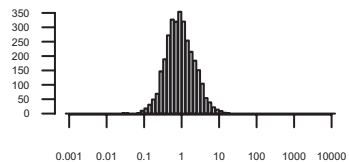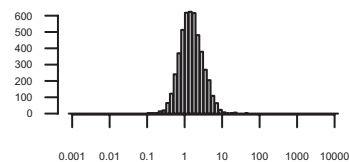

## *Coccidioides immitis*

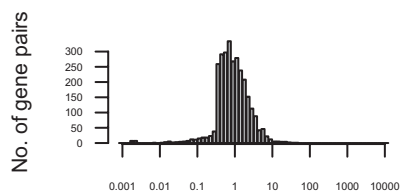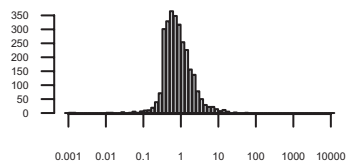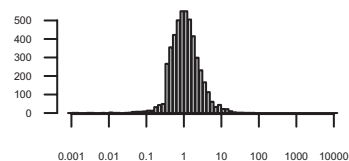

Intergenic distance [kb]

Intergenic distance [kb]

Intergenic distance [kb]

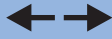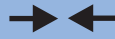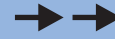

### *Fusarium oxysporium*

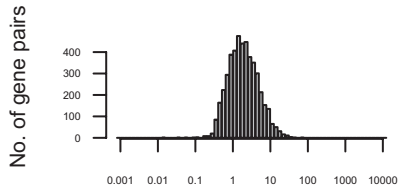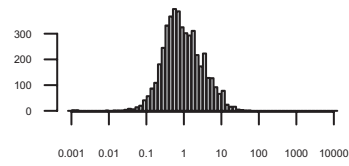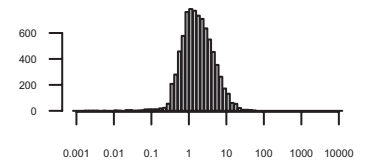

### *Fusarium verticillioides*

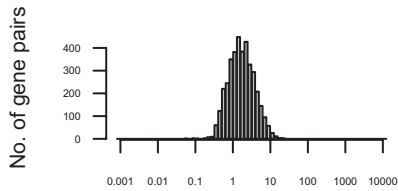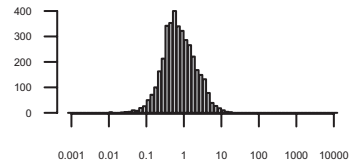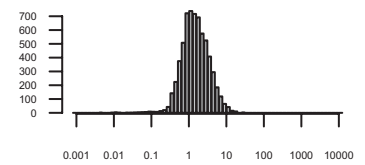

### *Gibberella zeae*

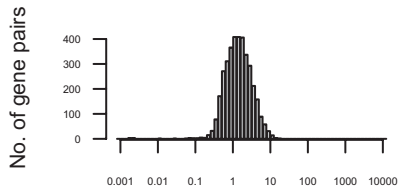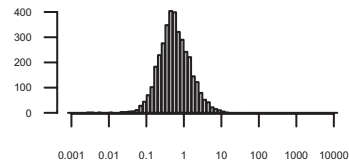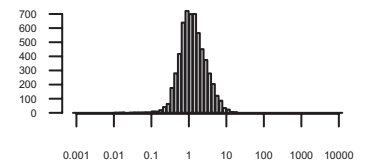

### *Histoplasma capsulatum*

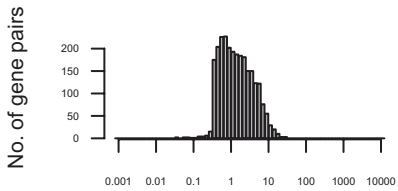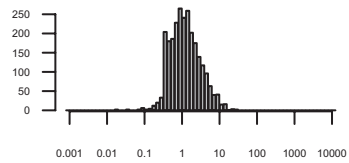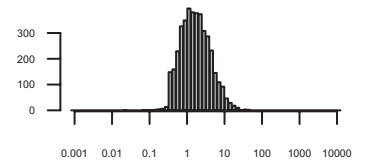

### *Magnaporthe grisea*

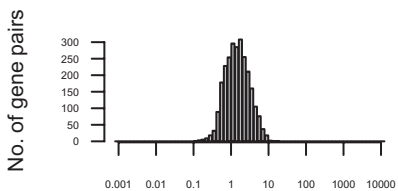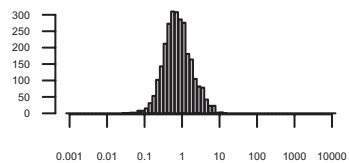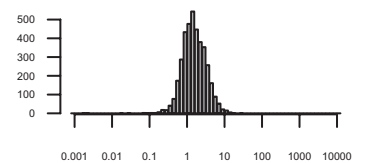

Integenic distance [kb]

Integenic distance [kb]

Integenic distance [kb]



## *Neurospora crassa*

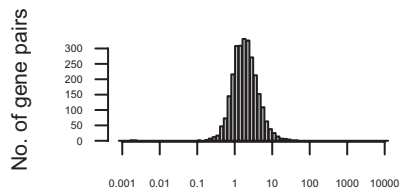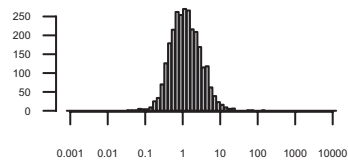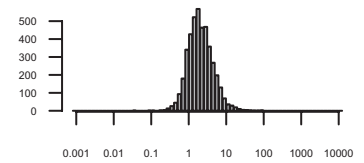

## *Sclerotinia sclerotiorum*

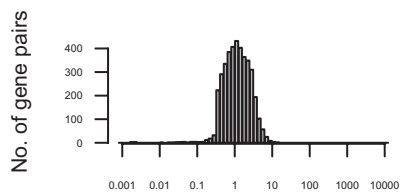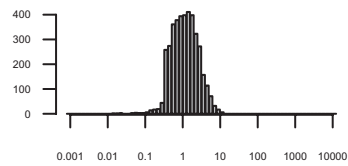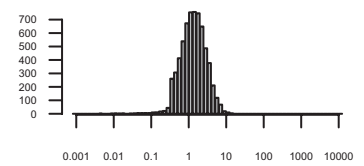

## *Stagonospora nodorum*

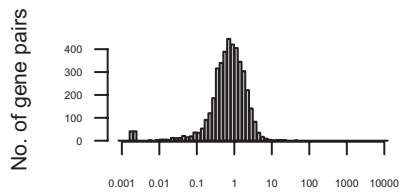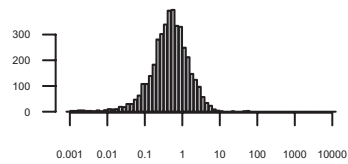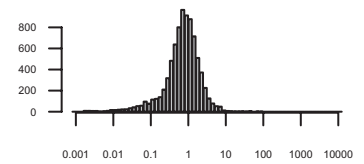

## *Uncinocarpus reesii*

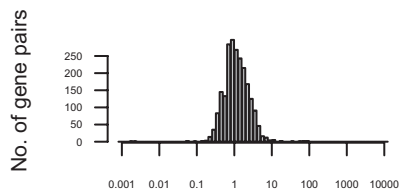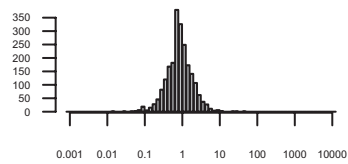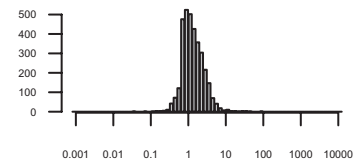

## *Clavispora lusitaniae*

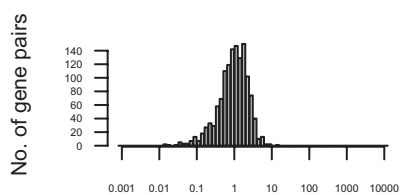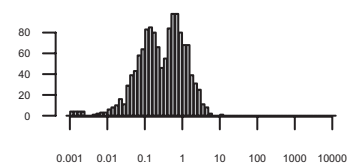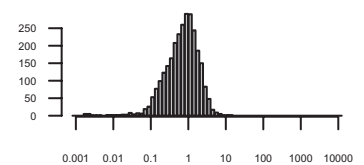

Intergenic distance [kb]

Intergenic distance [kb]

Intergenic distance [kb]



### *Candida tropicalis*

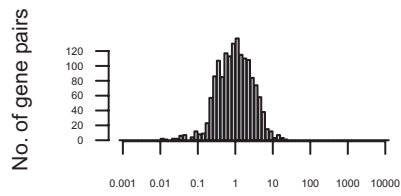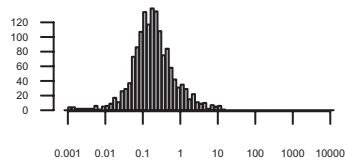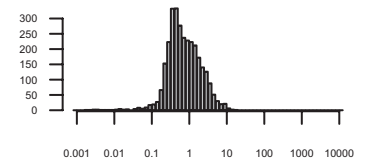

### *Lodderomyces elongisporus*

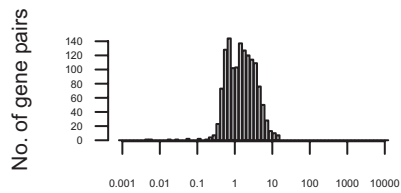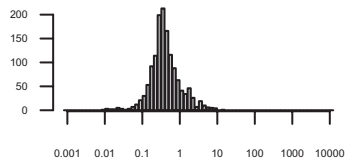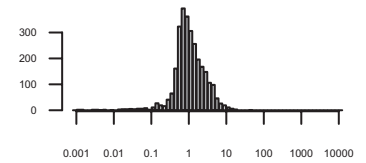

### *Pichia guilliermondii*

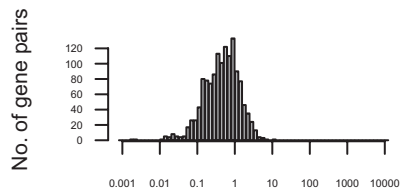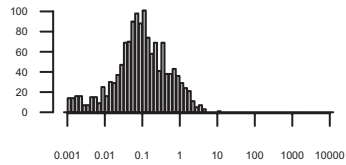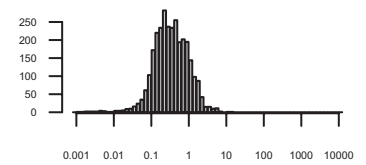

### *Saccharomyces cerevisiae*

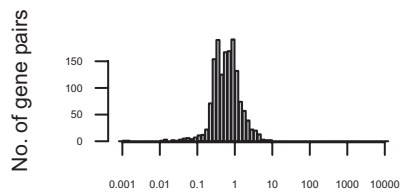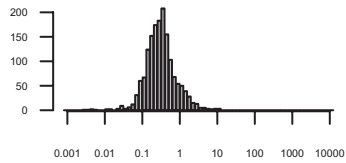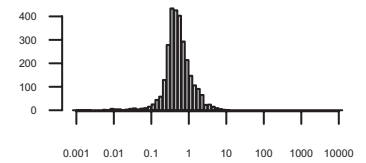

### *Schizosaccharomyces pombe*

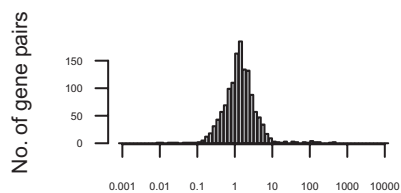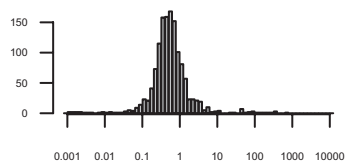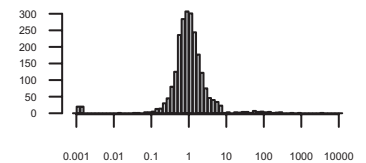

Integric distance [kb]

Integric distance [kb]

Integric distance [kb]

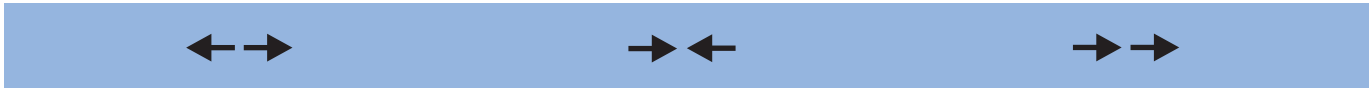

*Coprinus cinereus*

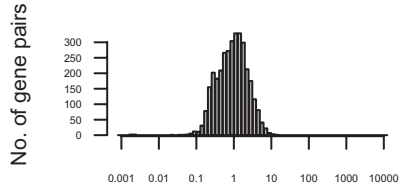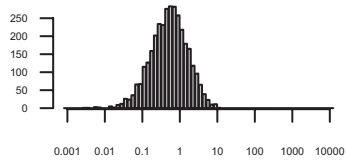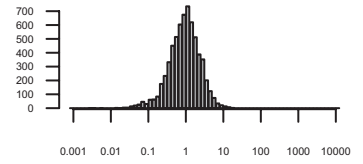

*Cryptococcus neoformans*

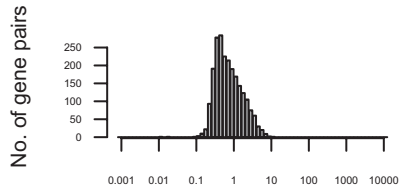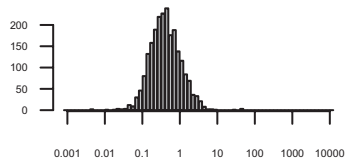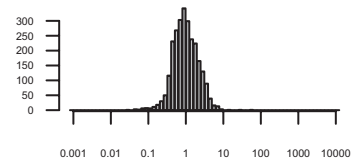

*Puccinia graminis*

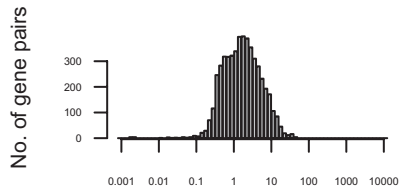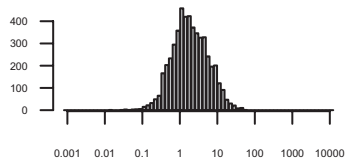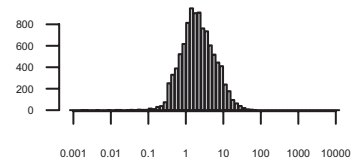

*Rhizopus oryzae*

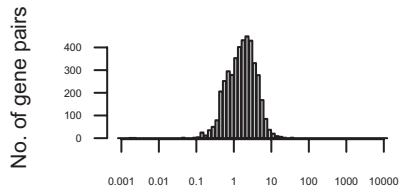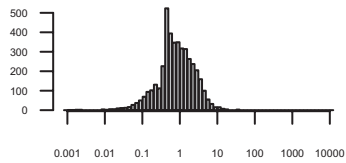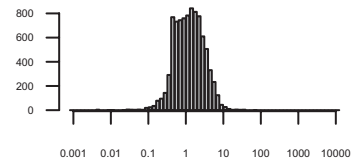

*Batrachochytrium dendrobatidis*

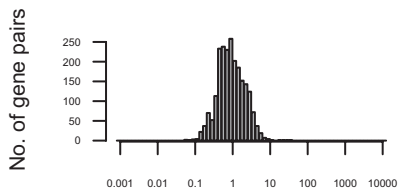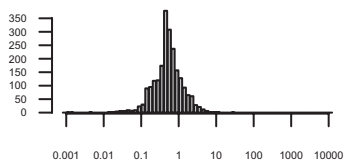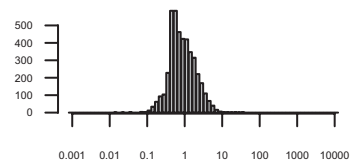

Intergenic distance [kb]

Intergenic distance [kb]

Intergenic distance [kb]





### *Danio rerio*

No. of gene pairs

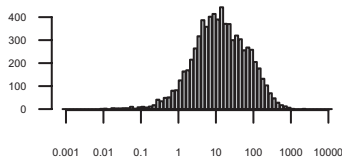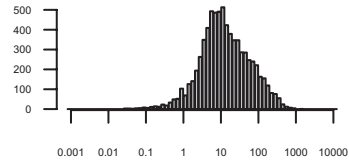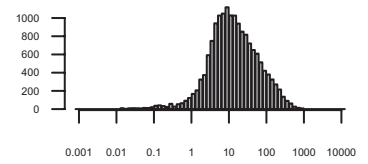

### *Fugu rubripes*

No. of gene pairs

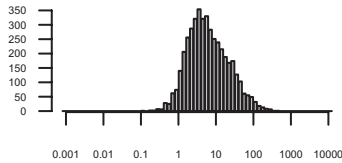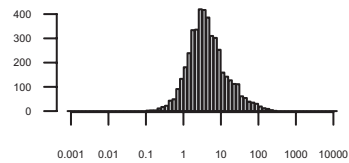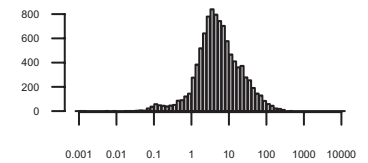

### *Gasterosteus aculeatus*

No. of gene pairs

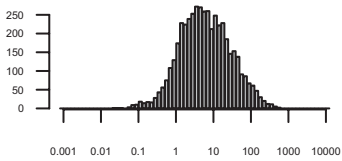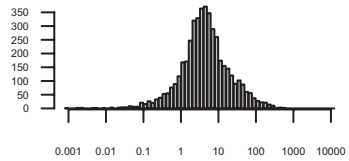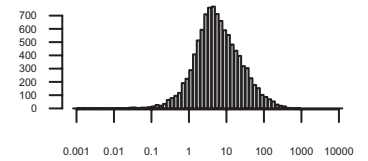

### *Oryzias latipes*

No. of gene pairs

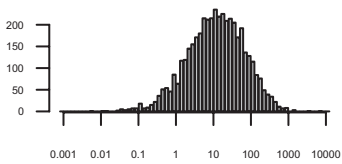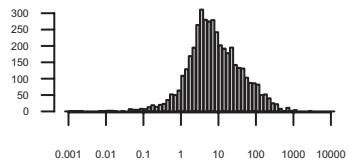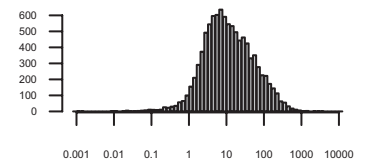

### *Tetraodon nigroviridis*

No. of gene pairs

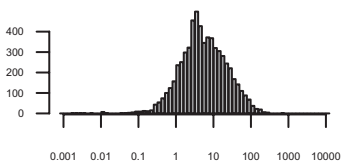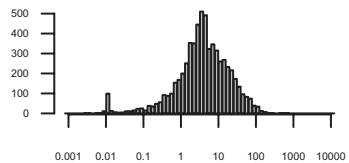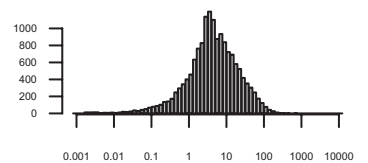

Intergenic distance [kb]

Intergenic distance [kb]

Intergenic distance [kb]



## *Xenopus tropicalis*

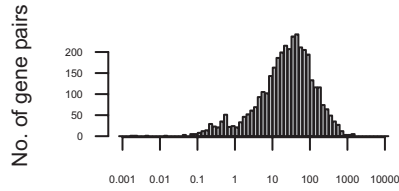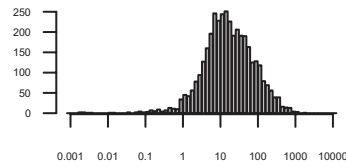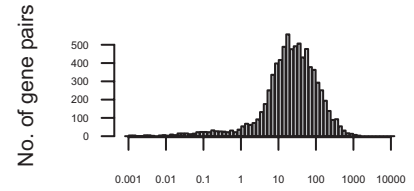

## *Ciona intestinalis*

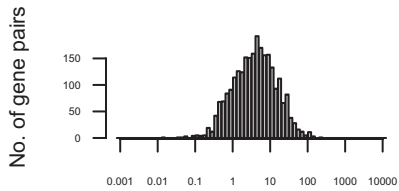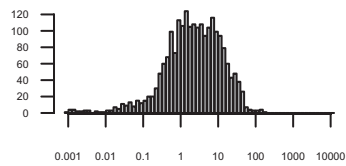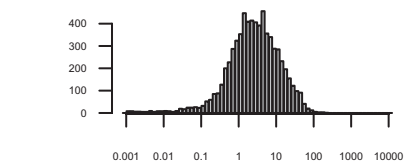

## *Caenorhabditis elegans*

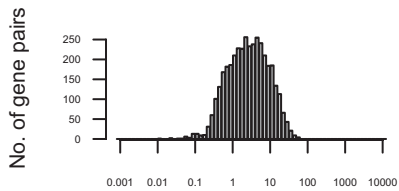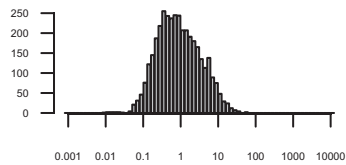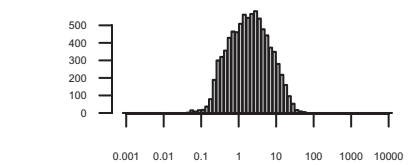

## *Aedes aegypti*

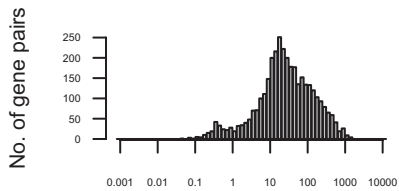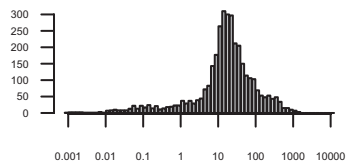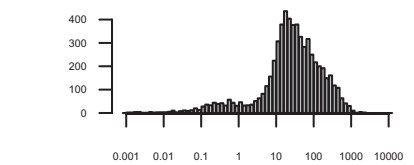

## *Anopheles gambiae*

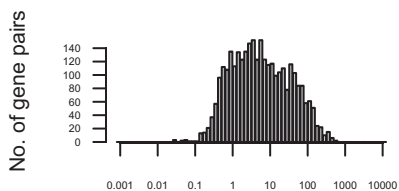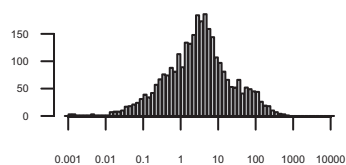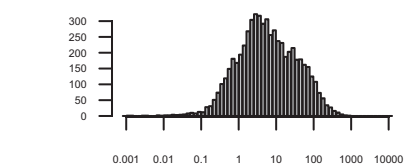

Intergenic distance [kb]

Intergenic distance [kb]

Intergenic distance [kb]



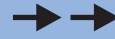

## *Drosophila melanogaster*

No. of gene pairs

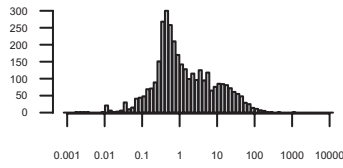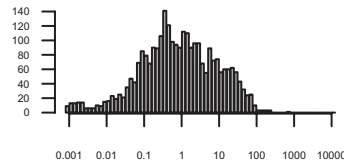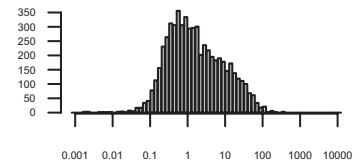

## *Daphnia pulex*

No. of gene pairs

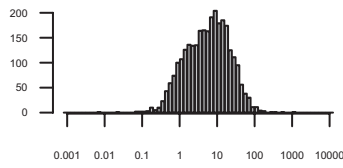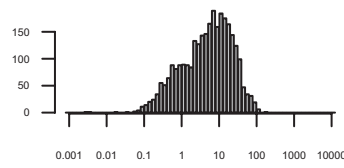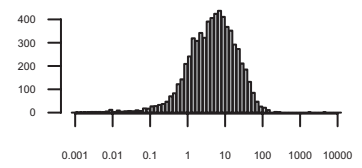

## *Nematostella vectensis*

No. of gene pairs

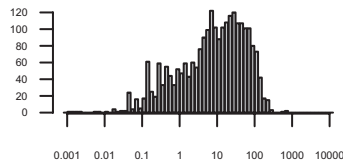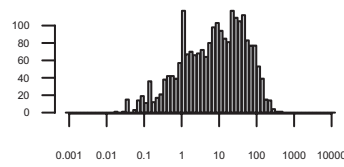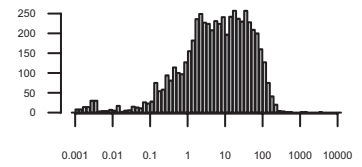

## *Trichoplax adhaerens*

No. of gene pairs

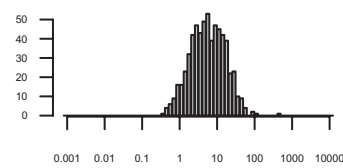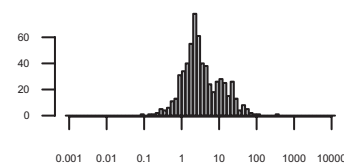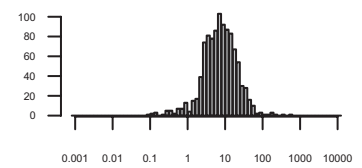

## *Monosiga brevicollis*

No. of gene pairs

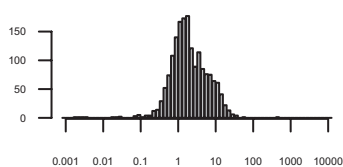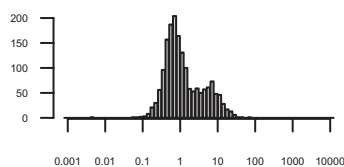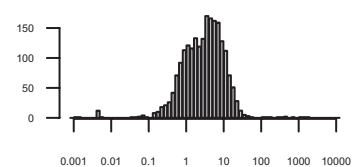

Intergenic distance [kb]

Intergenic distance [kb]

Intergenic distance [kb]



### *Dictyostelium discoideum*

No. of gene pairs

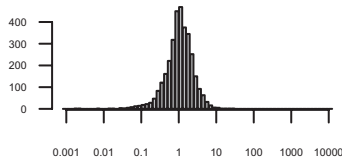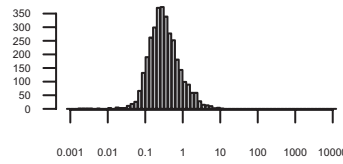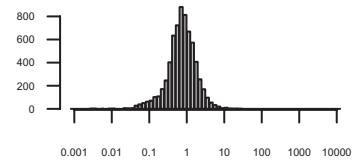

### *Entamoeba histolytica*

No. of gene pairs

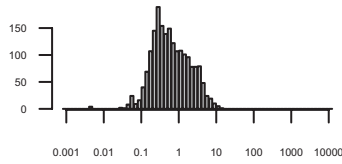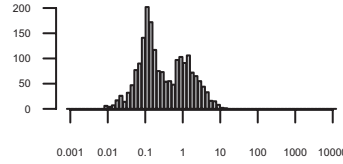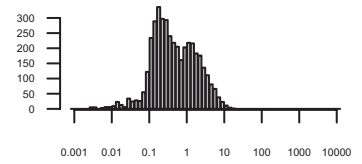

### *Arabidopsis thaliana*

No. of gene pairs

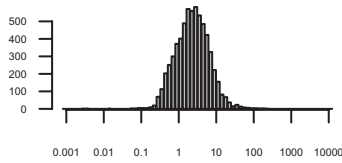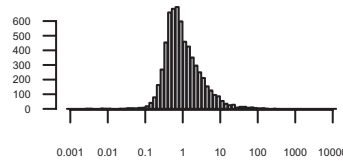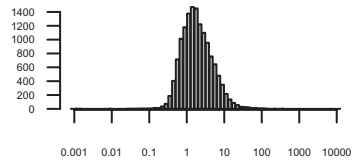

### *Oryza sativa*

No. of gene pairs

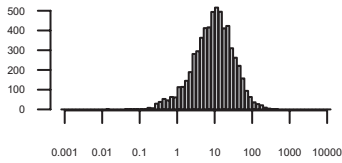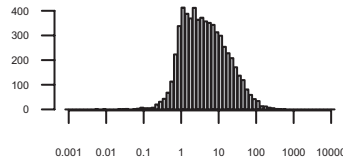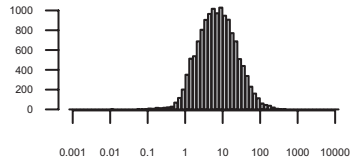

### *Chlamydomonas reinhardtii*

No. of gene pairs

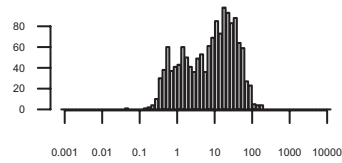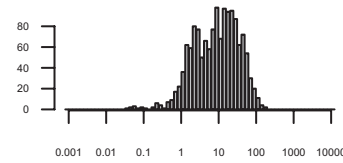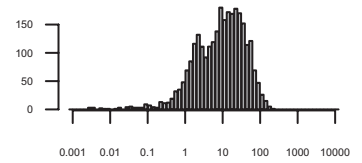

Intergenic distance [kb]

Intergenic distance [kb]

Intergenic distance [kb]

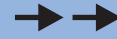

## *Cyanidioschyzon merolae*

No. of gene pairs

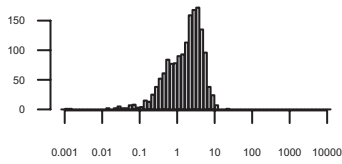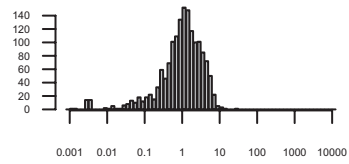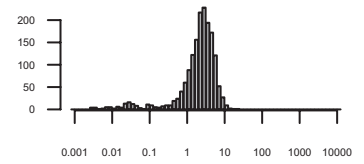

## *Aureococcus anophagefferens*

No. of gene pairs

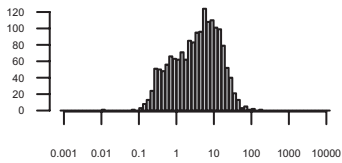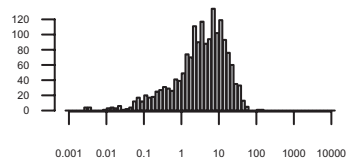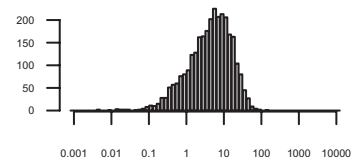

## *Thalassiosira pseudonana*

No. of gene pairs

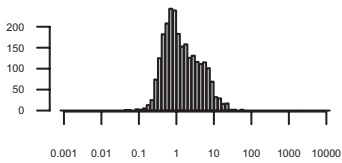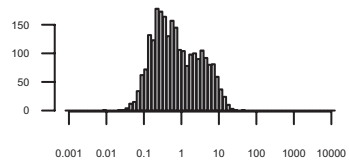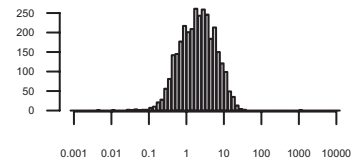

## *Phytophthora infestans*

No. of gene pairs

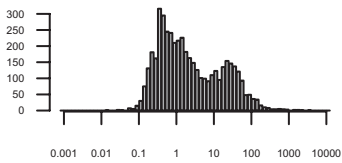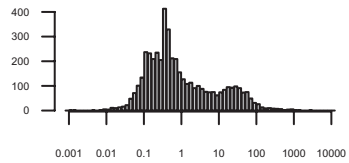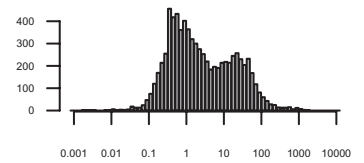

## *Cryptosporidium parvum*

No. of gene pairs

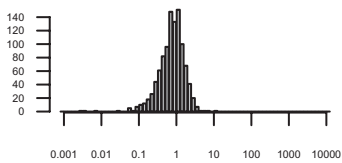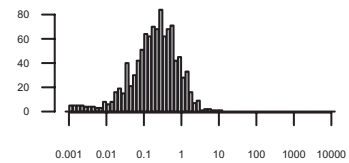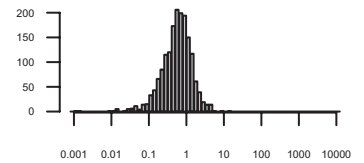

Intergenic distance [kb]

Intergenic distance [kb]

Intergenic distance [kb]



## *Plasmodium falciparum*

No. of gene pairs

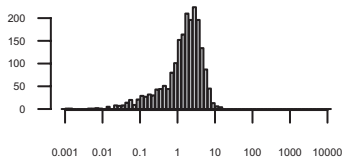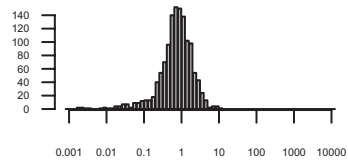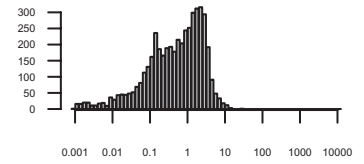

## *Theileria parva*

No. of gene pairs

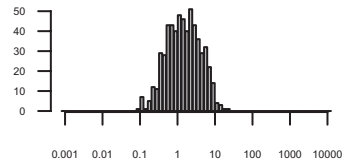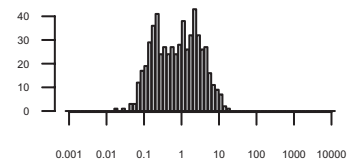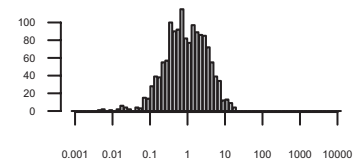

## *Toxoplasma gondii*

No. of gene pairs

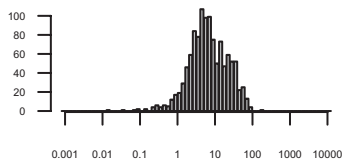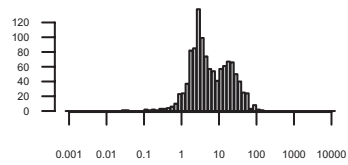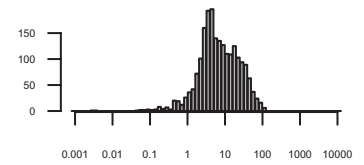

## *Leishmania infantum*

No. of gene pairs

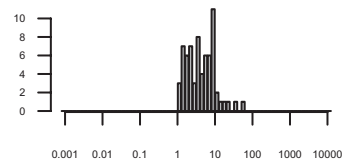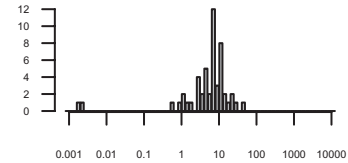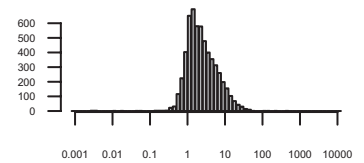

## *Naegleria gruberi*

No. of gene pairs

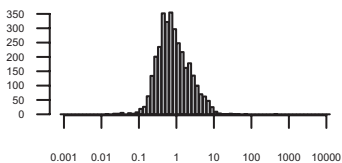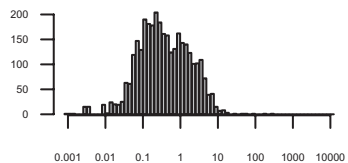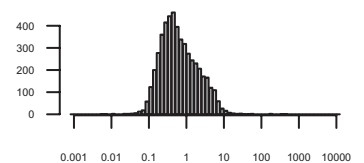

Intergenic distance [kb]

Intergenic distance [kb]

Intergenic distance [kb]



*Giardia lamblia*

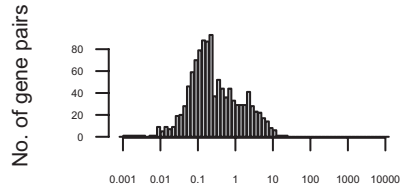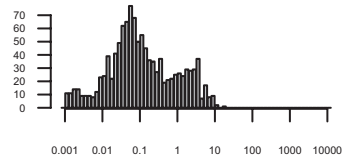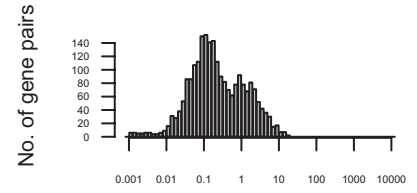

*Trichomonas vaginalis*

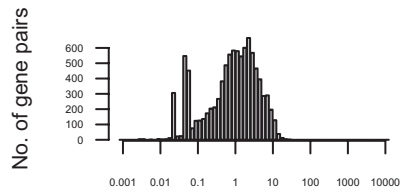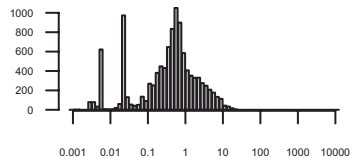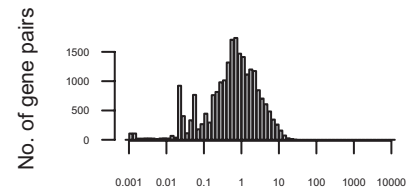

Integenic distance [kb]

Integenic distance [kb]

Integenic distance [kb]
