# Supplementary material for: Analysis of Gene Order Conservation in Eukaryotes Identifies Transcriptionally and Functionally Linked Genes
Source: PubMed Central journal article supplement (PMC2871058; doi:10.1371/journal.pone.0010654), 2010-05-14
Supplement: pone.0010654.s003.pdf [file pone.0010654.s003.pdf]

# Table S1: Sources of genomic sequences, statistics on proteins, relative gene orientation, and clustering using OrthoMCL and Pfam

NOTE: Download date is given where no version could be established. When position information was available from protein sequences or from a correspondent feature table no nucleotide sequences were used to map the proteins. pp stands for protein prediction set release date.

| ORGANISM                         | ABB.    |       | VERSION       |   | Total<br>No.<br>Proteins | Reduced<br>No.<br>Proteins | Relative gene orientation |       |       | Clustered<br>by<br>PFAM | Clustered<br>by<br>ORTHOMCL |
|----------------------------------|---------|-------|---------------|---|--------------------------|----------------------------|---------------------------|-------|-------|-------------------------|-----------------------------|
|                                  |         |       | P             | A |                          |                            | →→                        | →←    | ←→    |                         |                             |
| <i>PEZIZOMYCOTINA</i>            |         |       |               |   |                          |                            |                           |       |       |                         |                             |
| <i>Aspergillus nidulans</i>      | Aspnid  | Broad | Release 4     |   | 10 701                   | 10 699                     | 4 689                     | 2 899 | 2 879 | 6 703                   | 9 019                       |
| <i>Aspergillus terreus</i>       | Aspter  | Broad | pp 06-05-23   |   | 10 406                   | 10 406                     | 4 610                     | 2 886 | 2 891 | 6 696                   | 9 044                       |
| <i>Botrytis cinerea</i>          | Botcin  | Broad | pp 05-04-10   |   | 16 448                   | 16 448                     | 7 375                     | 4 242 | 4 324 | 5 874                   | 9 957                       |
| <i>Chaetomium globosum</i>       | Chaglo  | Broad | pp 05-06-27   |   | 11 124                   | 11 124                     | 4 760                     | 3 165 | 3 172 | 5 739                   | 8 808                       |
| <i>Coccidioides immitis</i>      | Cocimm  | Broad | pp 06-25-01   |   | 10 459                   | 10 457                     | 4 765                     | 2 841 | 2 844 | 4 895                   | 8 008                       |
| <i>Fusarium oxysporum</i>        | Fusoxy  | Broad | FO2 07-03-27  |   | 17 609                   | 17 606                     | 8 176                     | 4 661 | 4 673 | 8 906                   | 15 543                      |
| <i>Fusarium verticillioides</i>  | Fusver  | Broad | FV3 06/12     |   | 14 241                   | 14 175                     | 6 482                     | 3 827 | 3 830 | 7 614                   | 12 402                      |
| <i>Gibberella zeae</i>           | Gibzea  | Broad | FG1 07-03-27  |   | 13 321                   | 13 320                     | 5 938                     | 3 681 | 3 684 | 7 291                   | 11 155                      |
| <i>Histoplasma capsulatum</i>    | Hiscap  | Broad | pp 06-24-005  |   | 9 350                    | 9 349                      | 4 047                     | 2 556 | 2 557 | 4 626                   | 7 763                       |
| <i>Magnaporthe grisea</i>        | Maggr   | Broad | v5.0          |   | 11 109                   | 11 107                     | 3 865                     | 2 739 | 2 587 | 6 012                   | 8 710                       |
| <i>Neurospora crassa</i>         | Neucra  | Broad | v3.0          |   | 9 865                    | 9 825                      | 4 287                     | 2 716 | 2 699 | 5 306                   | 7 590                       |
| <i>Sclerotinia sclerotiorum</i>  | Scslscl | Broad | pp 05-10-01   |   | 14 522                   | 14 522                     | 6 523                     | 3 980 | 3 983 | 5 834                   | 9 732                       |
| <i>Stagonospora nodorum</i>      | Stanod  | Broad | SN15 08-05-15 |   | 16 597                   | 16 597                     | 8 228                     | 4 148 | 4 159 | 7 096                   | 10 007                      |
| <i>Uncinocarpus reesii</i>       | Uncree  | Broad | pp 06-05-26   |   | 7 798                    | 7 798                      | 3 371                     | 2 203 | 2 201 | 4 522                   | 6 869                       |
| <i>SACCHAROMYCOTINA</i>          |         |       |               |   |                          |                            |                           |       |       |                         |                             |
| <i>Claviceps lusitanae</i>       | Clalus  | Broad | pp 06-01-25   |   | 5 941                    | 5 823                      | 2 777                     | 1 518 | 1 520 | 3 871                   | 5 035                       |
| <i>Candida tropicalis</i>        | Cantr   | Broad | pp 06-06-12   |   | 6 258                    | 6 210                      | 3 048                     | 1 571 | 1 570 | 4 222                   | 5 593                       |
| <i>Lodderomyces elongisporus</i> | Lodelo  | Broad | 2007-01-15    |   | 5 798                    | 5 743                      | 2 858                     | 1 431 | 1 428 | 3 911                   | 5 226                       |
| <i>Pichia guilliermondii</i>     | Picgui  | Broad | pp 06-15-03   |   | 5 920                    | 5 832                      | 2 936                     | 1 442 | 1 445 | 4 170                   | 5 315                       |
| <i>Saccharomyces cerevisiae</i>  | Saccer  | SGD   | 2005-02-17    |   | 6 652                    | 6 504                      | 2 864                     | 1 814 | 1 810 | 4 378                   | 4 853                       |
| <i>TAPHRINOMYCOTINA</i>          |         |       |               |   |                          |                            |                           |       |       |                         |                             |
| <i>Schizosaccharomyces pombe</i> | Schpom  | Broad | 2008-04-21    |   | 4 995                    | 4 987                      | 2 280                     | 1 350 | 1 351 | 4 042                   | 4 174                       |
| <i>BASIDIOMYCOTA</i>             |         |       |               |   |                          |                            |                           |       |       |                         |                             |
| <i>Coprinus cinereus</i>         | Copcin  | Broad | v1.0          |   | 13 544                   | 13 544                     | 6 421                     | 3 345 | 3 351 | 5 800                   | 9 897                       |
| <i>Cryptococcus neoformans</i>   | Cryneo  | Broad | v3.0          |   | 7 299                    | 7 297                      | 2 613                     | 2 232 | 2 251 | 4 506                   | 5 642                       |
| <i>Puccinia graminis</i>         | Pucgra  | Broad | pp 07-07-13   |   | 20 567                   | 20 566                     | 9 996                     | 5 097 | 5 107 | 5 031                   | 15 691                      |

| ORGANISM                           | ABB.   |                      | VERSION      |            | Total<br>No.<br>Proteins | Reduced<br>No.<br>Proteins | Relative gene orientation |       |       | Clustered<br>by<br>PFAM | Clustered<br>by<br>ORTHOMCL |
|------------------------------------|--------|----------------------|--------------|------------|--------------------------|----------------------------|---------------------------|-------|-------|-------------------------|-----------------------------|
|                                    |        |                      | P            | A          |                          |                            | → →                       | → ←   | ← →   |                         |                             |
| <b>ZYGOMYCOTA</b>                  |        |                      |              |            |                          |                            |                           |       |       |                         |                             |
| <i>Rhizopus oryzae</i>             | Rhiory | Broad                | RO3 04-09-09 |            | 17 413                   | 17 413                     | 8 832                     | 4 254 | 4 246 | 8 376                   | 13 837                      |
| <b>CHYTRIDIOMYCOTA</b>             |        |                      |              |            |                          |                            |                           |       |       |                         |                             |
| <i>Batrachomyces dendrobatidis</i> | Batden | Broad                | pp 07-01-03  |            | 8 863                    | 8 794                      | 4 318                     | 2 198 | 2 213 | 4 378                   | 6 618                       |
| <b>MICROSPORIDIA</b>               |        |                      |              |            |                          |                            |                           |       |       |                         |                             |
|                                    |        | Antonospora locustae |              |            |                          |                            |                           |       |       |                         |                             |
| <i>Antonospora locustae</i>        | Antloc | DB                   | 2008-04-17   | 2008-04-17 | 2 606                    | 2 470                      | 708                       | 430   | 334   | 881                     | 1 923                       |
| <i>Encephalitozoon cuniculi</i>    | Encunc | NCBI                 | 2008-04-18   | 2008-04-18 | 1 996                    | 1 945                      | 941                       | 497   | 496   | 1 141                   | 1 454                       |
| <b>MAMMALS</b>                     |        |                      |              |            |                          |                            |                           |       |       |                         |                             |
| <i>Homo sapiens</i>                | Homsap | Ensembl              | 48.36j       |            | 46 610                   | 22 481                     | 10 694                    | 5 849 | 5 856 | 16 632                  | 19 365                      |
| <i>Mus musculus</i>                | Musmus | Ensembl              | 48.37a       |            | 39 458                   | 23 193                     | 11 517                    | 5 766 | 5 774 | 17 953                  | 20 319                      |
| <b>AVES</b>                        |        |                      |              |            |                          |                            |                           |       |       |                         |                             |
| <i>Gallus gallus</i>               | Galgal | Ensembl              | 48.2f        |            | 22 195                   | 16 597                     | 7 817                     | 4 364 | 4 364 | 11 900                  | 13 772                      |
| <b>FISHES</b>                      |        |                      |              |            |                          |                            |                           |       |       |                         |                             |
| <i>Danio rerio</i>                 | Danrer | NCBI                 | 2008-02-26   |            | 32 191                   | 31 206                     | 16 305                    | 7 440 | 7 436 | 22 665                  | 25 944                      |
| <i>Fugu rubripes</i>               | Fugrub | Ensembl              | 48.7b        |            | 21 974                   | 21 775                     | 9 907                     | 4 560 | 4 518 | 16 289                  | 19 985                      |
| <i>Gasterosteus aculeatus</i>      | Gasacu | Ensembl              | 46.1d        |            | 27 581                   | 20 730                     | 10 356                    | 4 915 | 4 899 | 16 456                  | 19 028                      |
| <i>Oryzias latipes</i>             | Orylat | Ensembl              | 48.1d        |            | 25 107                   | 19 974                     | 9 830                     | 4 617 | 4 612 | 15 459                  | 18 313                      |
| <i>Tetraodon nigroviridis</i>      | Tetnig | Ensembl              | 48.1j        |            | 28 002                   | 27 932                     | 15 426                    | 6 239 | 6 240 | 16 453                  | 19 426                      |
| <b>AMPHIBIA</b>                    |        |                      |              |            |                          |                            |                           |       |       |                         |                             |
| <i>Xenopus tropicalis</i>          | Xentro | JGI                  | v4.1         |            | 29 843                   | 18 811                     | 7 831                     | 4 124 | 4 055 | 14 674                  | 16 403                      |
| <b>UROCHORDATA</b>                 |        |                      |              |            |                          |                            |                           |       |       |                         |                             |
| <i>Ciona intestinalis</i>          | Cioint | Ensembl              | 46.2g        |            | 19 858                   | 13 896                     | 6 819                     | 2 720 | 2 729 | 7 797                   | 9 890                       |
| <b>NEMATODA</b>                    |        |                      |              |            |                          |                            |                           |       |       |                         |                             |
| <i>Brugia malayi</i>               | Brumal | NCBI                 | 2007-08-31   | 2007-08-31 | 379                      | 278                        | 24                        | 5     | 3     | 196                     | 249                         |
| <i>Caenorhabditis elegans</i>      | Caeele | NCBI                 | 2008-02-25   |            | 16 429                   | 16 303                     | 8 474                     | 3 912 | 3 911 | 9 538                   | 11 768                      |

| ORGANISM                         | ABB.   |                               | VERSION    |            | Total<br>No.<br>Proteins | Reduced<br>No.<br>Proteins | Relative gene orientation |       |       | Clustered<br>by<br>PFAM | Clustered<br>by<br>ORTHOMCL |
|----------------------------------|--------|-------------------------------|------------|------------|--------------------------|----------------------------|---------------------------|-------|-------|-------------------------|-----------------------------|
|                                  |        |                               | P          | A          |                          |                            | →→                        | →←    | ←→    |                         |                             |
| <i>INSECTS</i>                   |        |                               |            |            |                          |                            |                           |       |       |                         |                             |
| <i>Aedes aegypti</i>             | Aedaeg | Ensembl                       | 44.1a      |            | 16 789                   | 15 324                     | 6 091                     | 3 902 | 3 719 | 10 573                  | 12 981                      |
| <i>Anopheles gambiae</i>         | Anogam | Ensembl                       | 46.3i      |            | 13 133                   | 12 359                     | 5 936                     | 3 208 | 3 209 | 8 658                   | 10 514                      |
| <i>Drosophila melanogaster</i>   | Dromel | Ensembl                       | 46.43b     |            | 19 837                   | 13 622                     | 5 888                     | 3 860 | 3 862 | 9 370                   | 10 423                      |
| <i>CRUSTACEA</i>                 |        |                               |            |            |                          |                            |                           |       |       |                         |                             |
| <i>Daphnia pulex</i>             | Dappul | JGI                           | v1.0       | v1.0       | 22 636                   | 14 776                     | 6 521                     | 3 201 | 3 204 | 6 668                   | 12 174                      |
| <i>CNIDARIA</i>                  |        |                               |            |            |                          |                            |                           |       |       |                         |                             |
| <i>Nematostella vectensis</i>    | Nemvec | JGI                           | v1.0       | v1.0       | 115 414                  | 17 131                     | 5 690                     | 4 040 | 3 937 | 1 903                   | 14 514                      |
| <i>PLACOZOA</i>                  |        |                               |            |            |                          |                            |                           |       |       |                         |                             |
| <i>Trichoplax adhaerens</i>      | Triadh | JGI                           | v1.0       | v1.0       | 2 360                    | 2 283                      | 1 023                     | 626   | 628   | 1 645                   | 1 945                       |
| <i>CHOANOFLAGELLATA</i>          |        |                               |            |            |                          |                            |                           |       |       |                         |                             |
| <i>Monosiga brevicollis</i>      | Monbre | JGI                           | v1.0       | v1.0       | 24 784                   | 6 191                      | 2 124                     | 1 936 | 1 961 | 3 940                   | 4 584                       |
| <i>MYCETOZOA</i>                 |        |                               |            |            |                          |                            |                           |       |       |                         |                             |
| <i>Dictyostelium discoideum</i>  | Dicdis | DictyBase/NCBI                | 2007-01-23 | 2008-02-20 | 13 345                   | 13 343                     | 6 655                     | 3 342 | 3 340 | 6 868                   | 9 107                       |
| <i>ENTAMOEBIDAE</i>              |        |                               |            |            |                          |                            |                           |       |       |                         |                             |
| <i>Entamoeba histolytica</i>     | Enthis | Sanger                        | 2007-08-31 |            | 17 203                   | 9 641                      | 4 100                     | 1 977 | 1 952 | 4 191                   | 8 013                       |
| <i>STREPTHOPHYTA</i>             |        |                               |            |            |                          |                            |                           |       |       |                         |                             |
| <i>Arabidopsis thaliana</i>      | Aratha | NCBI                          | 2005-11-16 |            | 31 711                   | 26 812                     | 14 060                    | 6 373 | 6 374 | 20 040                  | 22 596                      |
| <i>Oryza sativa</i>              | Orysat | NCBI                          | 2008-03-04 |            | 26 777                   | 26 674                     | 13 559                    | 6 552 | 6 551 | 17 646                  | 19 028                      |
| <i>GREEN ALGAE</i>               |        |                               |            |            |                          |                            |                           |       |       |                         |                             |
| <i>Chlamydomonas reinhardtii</i> | Chlrei | JGI                           | v3.0       | v3.0       | 9 411                    | 6 419                      | 2 772                     | 1 503 | 1 491 | 3 280                   | 4 432                       |
| <i>Volvox carteri</i>            | Volcar | JGI                           | v1.0       | v1.0       | 5 605                    | 4 304                      | 1 787                     | 1 113 | 1 113 | 1 828                   | 3 594                       |
| <i>RED ALGAE</i>                 |        |                               |            |            |                          |                            |                           |       |       |                         |                             |
| <i>Cyanidioschyzon merolae</i>   | Cyamer | Cyanidioschyzon<br>merolae DB | 2008-02-26 |            | 5 014                    | 4 953                      | 1 670                     | 1 606 | 1 601 | 3 363                   | 3 497                       |

| ORGANISM                           | ABB.   |           | VERSION     |            | Total<br>No.<br>Proteins | Reduced<br>No.<br>Proteins | Relative gene orientation |        |       | Clustered<br>by<br>PFAM | Clustered<br>by<br>ORTHOMCL |
|------------------------------------|--------|-----------|-------------|------------|--------------------------|----------------------------|---------------------------|--------|-------|-------------------------|-----------------------------|
|                                    |        |           | P           | A          |                          |                            | →→                        | →←     | ←→    |                         |                             |
| <b>PELAGOPHYTES</b>                |        |           |             |            |                          |                            |                           |        |       |                         |                             |
| <i>Aureococcus anophagefferens</i> | Aurano | JGI       | v1.0        | v1.0       | 8 292                    | 7 215                      | 2 941                     | 1 793  | 1 800 | 4 702                   | 5 635                       |
| <b>DIATOMEA</b>                    |        |           |             |            |                          |                            |                           |        |       |                         |                             |
| <i>Thalassiosira pseudonana</i>    | Thapse | JGI       | v3.0        | v3.0       | 8 542                    | 8 227                      | 3 187                     | 2 505  | 2 508 | 4 412                   | 5 782                       |
| <b>OOMYCETES</b>                   |        |           |             |            |                          |                            |                           |        |       |                         |                             |
| <i>Phytophthora infestans</i>      | Phyinf | Broad     | pp 09-09-04 |            | 17 898                   | 17 892                     | 7 833                     | 4 682  | 4 646 | 7 974                   | 13 563                      |
| <b>APICOMPLEXA</b>                 |        |           |             |            |                          |                            |                           |        |       |                         |                             |
| <i>Cryptosporidium parvum</i>      | Crypar | NCBI      | 2008-02-26  |            | 3 805                    | 3 798                      | 1 715                     | 1 036  | 1 039 | 1 905                   | 2 202                       |
| <i>Plasmodium falciparum</i>       | Plafal | Plasmodb  | Release 5.3 |            | 27 917                   | 9 173                      | 4 816                     | 2 170  | 2 169 | 3 519                   | 6 239                       |
| <i>Theileria parva</i>             | Thepar | TIGR      | 2007-08-30  | 2007-08-30 | 3 271                    | 2 608                      | 1 422                     | 587    | 590   | 1 286                   | 1 702                       |
| <i>Toxoplasma gondii</i>           | Toxgon | Toxodb    | v4.2        | v4.2       | 4 579                    | 4 514                      | 2 091                     | 1 167  | 1 168 | 1 943                   | 2 478                       |
| <b>EUGLENOZOA</b>                  |        |           |             |            |                          |                            |                           |        |       |                         |                             |
| <i>Leishmania infantum</i>         | Leiinf | Sanger    | V5.2        | V5.2       | 6 802                    | 5 906                      | 5 747                     | 53     | 70    | 2 993                   | 3 044                       |
| <b>HETEROLOBOSEA</b>               |        |           |             |            |                          |                            |                           |        |       |                         |                             |
| <i>Naegleria gruberi</i>           | Naegrü | JGI       | v1.0        | v1.0       | 52 330                   | 12 511                     | 5 078                     | 3 446  | 3 447 | 6 598                   | 9 304                       |
| <b>DIPLOMANDIDA</b>                |        |           |             |            |                          |                            |                           |        |       |                         |                             |
| <i>Giardia lamblia</i>             | Gialam | GiardiaDB | Release 1.1 |            | 4 889                    | 4 790                      | 2 275                     | 1 240  | 1 237 | 2 188                   | 2 699                       |
| <b>PARABASALIDEA</b>               |        |           |             |            |                          |                            |                           |        |       |                         |                             |
| <i>Trichomonas vaginalis</i>       | Trivag | TrichDB   | Release 1   |            | 59 672                   | 59 637                     | 22 295                    | 10 860 | 9 475 | 13 271                  | 48 480                      |
