# Supplementary material for: Analysis of Gene Order Conservation in Eukaryotes Identifies Transcriptionally and Functionally Linked Genes
Source: PubMed Central journal article supplement (PMC2871058; doi:10.1371/journal.pone.0010654), 2010-05-14
Supplement: pone.0010654.s005.pdf [file pone.0010654.s005.pdf]

# Table S3: Intergenic distances

| ORGANISM                              | MEAN   | MEDIAN | SD      | ORGANISM                           | MEAN   | MEDIAN | SD      |
|---------------------------------------|--------|--------|---------|------------------------------------|--------|--------|---------|
| <i>Aspergillus nidulans</i>           | 1 121  | 752    | 1 116   | <i>Aedes aegypti</i>               | 57 124 | 17 869 | 111 932 |
| <i>Aspergillus terreus</i>            | 1 110  | 771    | 1 128   | <i>Anopheles gambiae</i>           | 17 397 | 3 630  | 39 534  |
| <i>Botrytis cinerea</i>               | 1 322  | 959    | 1 220   | <i>Drosophila melanogaster</i>     | 5 565  | 797    | 16 480  |
| <i>Chaetomium globosum</i>            | 1 338  | 984    | 1 289   | <i>Daphnia pulex</i>               | 20 627 | 4 628  | 111 722 |
| <i>Coccidioides immitis</i>           | 1 177  | 719    | 1 827   | <i>Nematostella vectensis</i>      | 36 219 | 6 409  | 124 125 |
| <i>Fusarium oxysporum</i>             | 2 039  | 1 157  | 2 744   | <i>Trichoplax adhaerens</i>        | 11 163 | 4 503  | 119 671 |
| <i>Fusarium verticillioides</i>       | 1 507  | 1 017  | 1 548   | <i>Monosiga brevicollis</i>        | 14 176 | 1 476  | 148 448 |
| <i>Gibberella zeae</i>                | 1 229  | 832    | 1 263   | <i>Dictyostelium discoideum</i>    | 792    | 555    | 940     |
| <i>Histoplasma capsulatum</i>         | 1 833  | 1 085  | 2 233   | <i>Entamoeba histolytica</i>       | 907    | 321    | 2 548   |
| <i>Magnaporthe grisea</i>             | 1 352  | 978    | 1 231   | <i>Arabidopsis thaliana</i>        | 2 533  | 1 266  | 5 801   |
| <i>Neurospora crassa</i>              | 2 006  | 1 349  | 2 814   | <i>Oryza sativa</i>                | 11 173 | 5 191  | 19 068  |
| <i>Sclerotinia sclerotiorum</i>       | 1 295  | 974    | 1 082   | <i>Chlamydomonas reinhardtii</i>   | 25 460 | 8 075  | 145 266 |
| <i>Stagonospora nodorum</i>           | 829    | 553    | 1 572   | <i>Volvox carteri</i>              | 51 297 | 9 829  | 206 498 |
| <i>Uncinocarpus reesii</i>            | 1 220  | 841    | 2 163   | <i>Cyanidioschyzon merolae</i>     | 2 011  | 1 433  | 11 521  |
| <i>Clavispora lusitaniae</i>          | 780    | 575    | 776     | <i>Aureococcus anophagefferens</i> | 16 471 | 3 684  | 114 663 |
| <i>Candida tropicalis</i>             | 887    | 436    | 1 277   | <i>Thalassiosira pseudonana</i>    | 2 783  | 1 047  | 18 830  |
| <i>Lodderomyces elongisporus</i>      | 1 174  | 683    | 1 459   | <i>Phytophthora infestans</i>      | 21 468 | 1 012  | 156 548 |
| <i>Pichia guilliermondii</i>          | 427    | 236    | 586     | <i>Cryptosporidium parvum</i>      | 585    | 438    | 631     |
| <i>Saccharomyces cerevisiae</i>       | 540    | 353    | 655     | <i>Plasmodium falciparum</i>       | 1 153  | 705    | 1 419   |
| <i>Schizosaccharomyces pombe</i>      | 3 459  | 722    | 45 495  | <i>Theileria parva</i>             | 1 514  | 811    | 1 915   |
| <i>Coprinus cinereus</i>              | 976    | 672    | 1 038   | <i>Toxoplasma gondii</i>           | 10 472 | 4 581  | 28 930  |
| <i>Cryptococcus neoformans</i>        | 852    | 529    | 2 781   | <i>Leishmania infantum</i>         | 3 211  | 1 684  | 7 015   |
| <i>Puccinia graminis</i>              | 2 680  | 1 479  | 3 556   | <i>Naegleria gruberi</i>           | 2 332  | 471    | 26 625  |
| <i>Rhizopus oryzae</i>                | 1 425  | 957    | 1 629   | <i>Giardia lamblia</i>             | 646    | 127    | 1 352   |
| <i>Batrachochytrium dendrobatidis</i> | 886    | 565    | 1 131   | <i>Trichomonas vaginalis</i>       | 1 154  | 514    | 1 737   |
| <i>Antonospora locustae</i>           | 610    | 238    | 945     |                                    |        |        |         |
| <i>Encephalitozoon cuniculi</i>       | 180    | 91     | 330     |                                    |        |        |         |
| <i>Homo sapiens</i>                   | 87 820 | 18 115 | 332 093 |                                    |        |        |         |
| <i>Mus musculus</i>                   | 75 692 | 16 201 | 235 307 |                                    |        |        |         |
| <i>Gallus gallus</i>                  | 43 790 | 9 728  | 114 376 |                                    |        |        |         |
| <i>Danio rerio</i>                    | 30 646 | 9 805  | 59 969  |                                    |        |        |         |
| <i>Fugu rubripes</i>                  | 9 798  | 3 735  | 18 826  |                                    |        |        |         |
| <i>Gasterosteus aculeatus</i>         | 12 752 | 3 976  | 28 709  |                                    |        |        |         |
| <i>Oryzias latipes</i>                | 28 293 | 7 590  | 82 460  |                                    |        |        |         |
| <i>Tetraodon nigroviridis</i>         | 9 303  | 3 426  | 17 904  |                                    |        |        |         |
| <i>Xenopus tropicalis</i>             | 45 028 | 17 957 | 80 920  |                                    |        |        |         |
| <i>Ciona intestinalis</i>             | 5 592  | 2 233  | 9 898   |                                    |        |        |         |
| <i>Brugia malayi</i>                  | 2 664  | 1 509  | 3 128   |                                    |        |        |         |
| <i>Caenorhabditis elegans</i>         | 3 075  | 1 421  | 4 542   |                                    |        |        |         |
